# Supplementary material
Source: Springer Nature journal article supplement (https://www.springermedizin.de/resource/supplementary/12992_2010_95_MOESM2_ESM.pdf/9616448)
Supplement: MOESM2 [file 9616448]

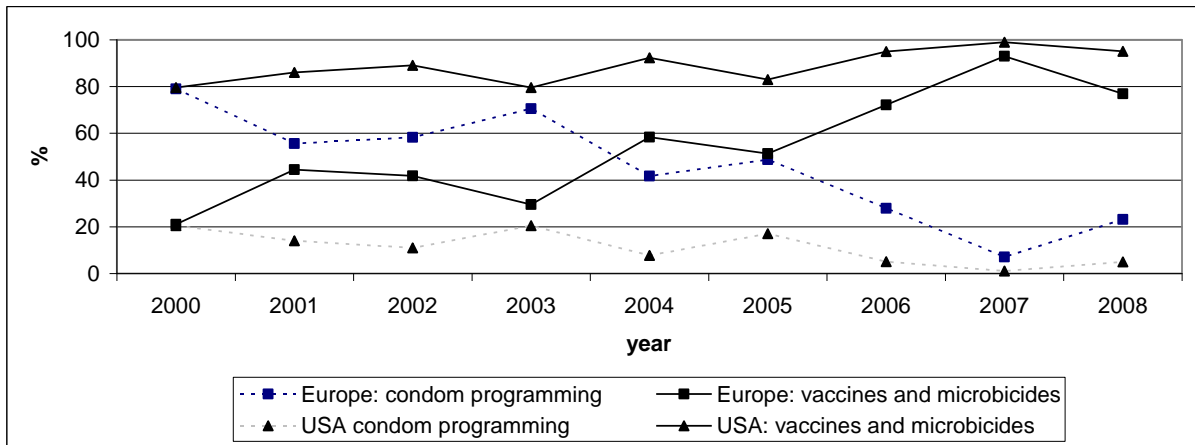

|                                   | 2000 | 2001 | 2002 | 2003 | 2004 | 2005 | 2006 | 2007 | 2008 |
|-----------------------------------|------|------|------|------|------|------|------|------|------|
| Europe: condom programming        | 79   | 56   | 58   | 70   | 42   | 49   | 28   | 7    | 23   |
| USA condom programming            | 20   | 14   | 11   | 20   | 8    | 17   | 5    | 1    | 5    |
| Europe: vaccines and microbicides | 21   | 44   | 42   | 30   | 58   | 51   | 72   | 93   | 77   |
| USA: vaccines and microbicides    | 80   | 86   | 89   | 80   | 92   | 83   | 95   | 99   | 95   |
